# Supplementary material for: Risk of adverse obstetrical and neonatal outcomes in women consuming recreational drugs during pregnancy
Source: Springer Nature journal article supplement (doi:10.1186/s12884-024-07062-1), 2025-04-16
Supplement: MOESM1 [file 12884_2024_7062_MOESM1_ESM-1.pdf]

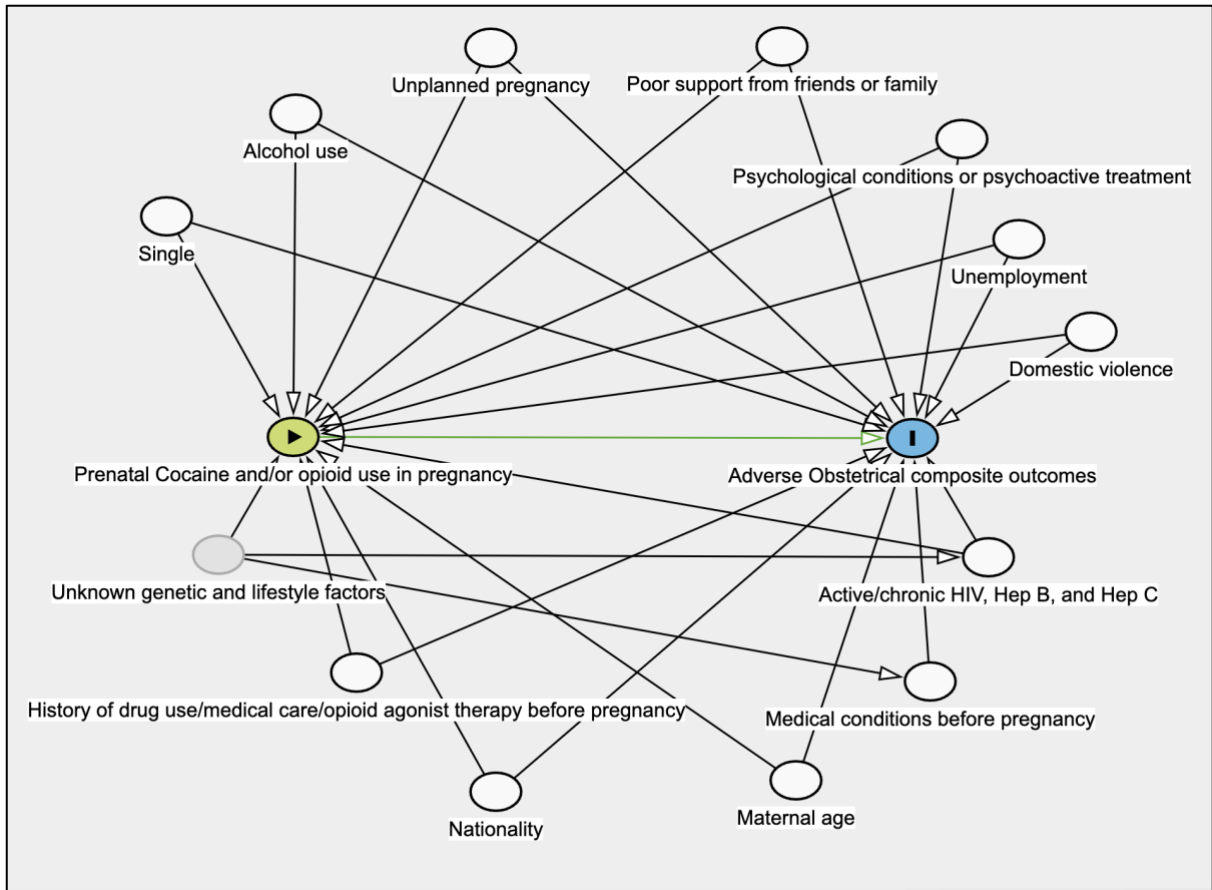

**Figure S1: Potential confounders for Adverse obstetrical composite outcomes.**

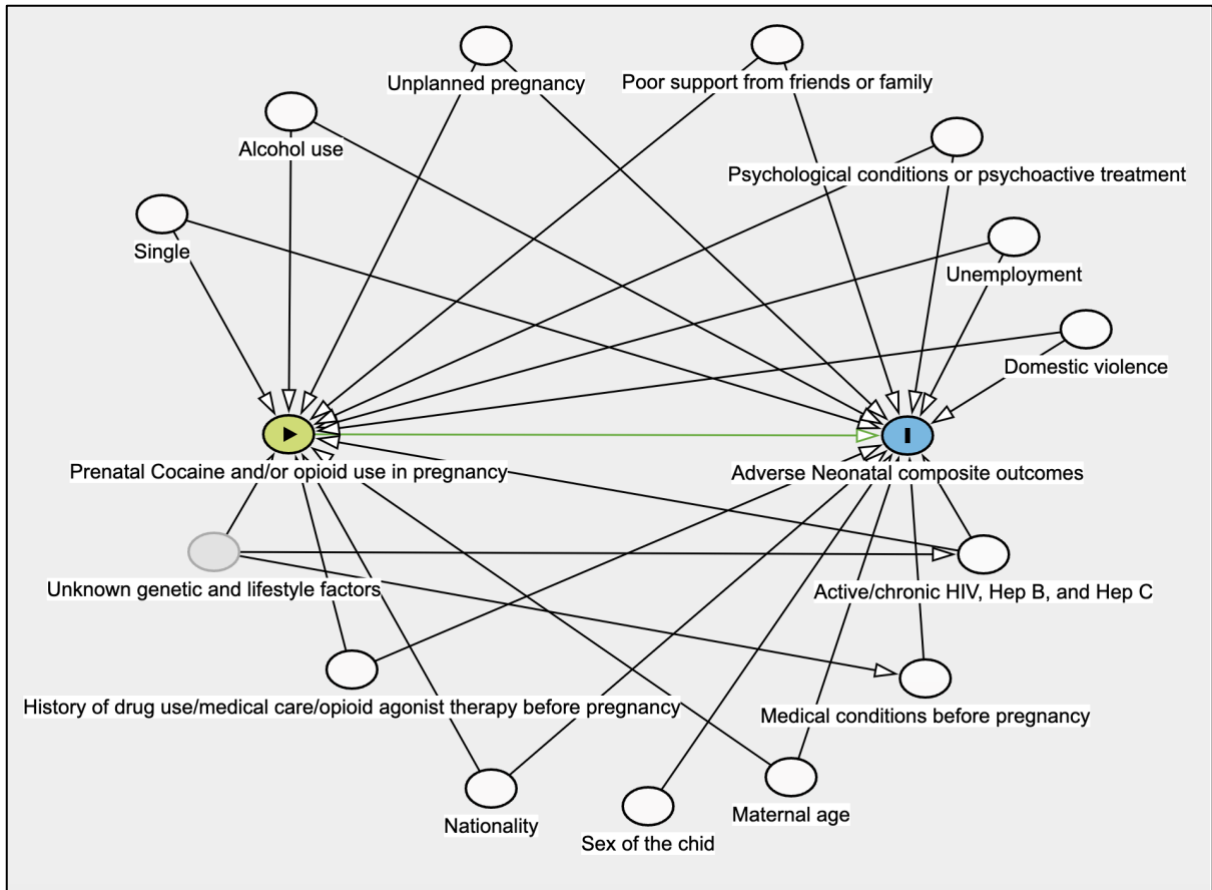

**Figure S2: Potential confounders for Adverse Neonatal composite outcomes.**
